# Supplementary material for: The direct application of spent graphite as a functional interlayer with enhanced polysulfide trapping and catalytic performance for Li–S batteries
Source: Royal Society of Chemistry journal article supplement (doi:10.1039/d0gc04033a), 2020-12-24
Supplement: d0gc04033a1.pdf [file d0gc04033a1.pdf]

## Supporting Information

### **Direct application of spent graphite as functional interlayer with enhanced polysulfides trapping and catalytic performance for Li-S batteries**

Qi Xu<sup>a</sup>, Yang Wang<sup>a</sup>, Xinyu Shi<sup>a,b</sup>, Yanjun Zhong<sup>a,\*</sup>, Zhenguo Wu<sup>a,\*</sup>, Yang Song<sup>a</sup>,  
Gongke Wang<sup>c</sup>, Yuxia Liu<sup>d</sup>, Benhe Zhong<sup>a</sup> and Xiaodong Guo<sup>a</sup>

<sup>a</sup>*School of Chemical Engineering, Sichuan University, Chengdu 610065, P. R. China*

<sup>b</sup>*School of Chemical and Environmental Engineering, Hubei Minzu University, Enshi 445000, P. R. China*

<sup>c</sup>*School of Materials Science and Engineering, Henan Normal University, XinXiang 453007, P. R. China*

<sup>d</sup>*The Key Laboratory of Life-Organic Analysis, Key Laboratory of Pharmaceutical Intermediates and Analysis of Natural Medicine, School of Chemistry and Chemical Engineering, Qufu Normal University, Qufu 273165, P. R. China.*

*\*Corresponding authors:*

*\*E-mail addresses: yjzhong@scu.edu.cn; zhenguowu@scu.edu.cn*

**Table S1** ICP-AES results of SG.

| Sample   | Li     | Ni     | Co    | Mn     | Al     | Cu     | Fe     | K      | Na     | P     |
|----------|--------|--------|-------|--------|--------|--------|--------|--------|--------|-------|
| SG (ppm) | 266.29 | 215.05 | 75.33 | 365.88 | 137.20 | 139.21 | 120.79 | 542.27 | 345.56 | 733.9 |

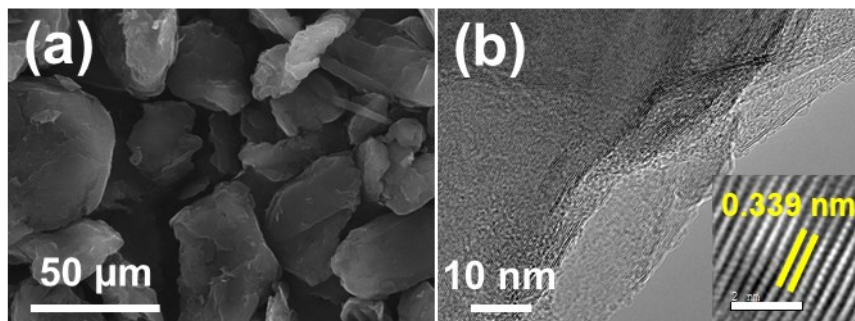**Fig. S1** (a) SEM and (b) HRTEM images of AG.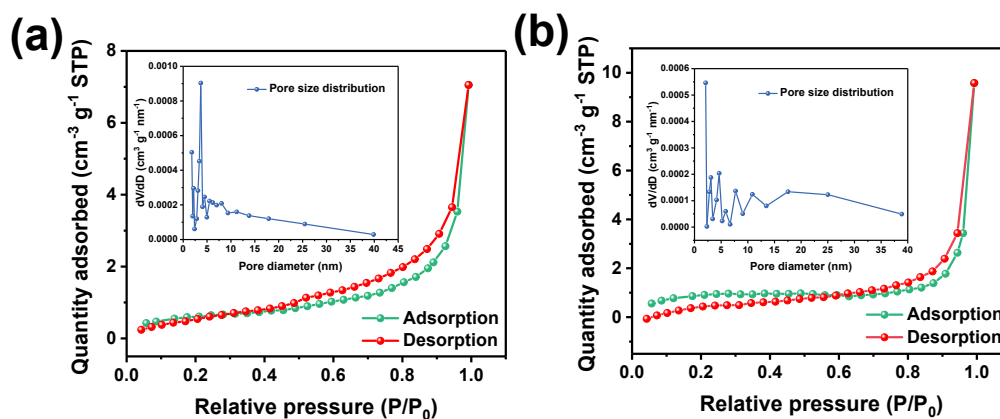**Fig. S2** N<sub>2</sub> adsorption-desorption isotherms and corresponding pore size distributions of (a) AG and (b) SG.**Table S2** Physical parameters of AG and SG at (002) crystal surface.

| Samples | $2\theta_{002}$ (°) | $d_{(002)}$ (nm) |
|---------|---------------------|------------------|
| AG      | 26.210              | 0.339            |
| SG      | 26.183              | 0.340            |

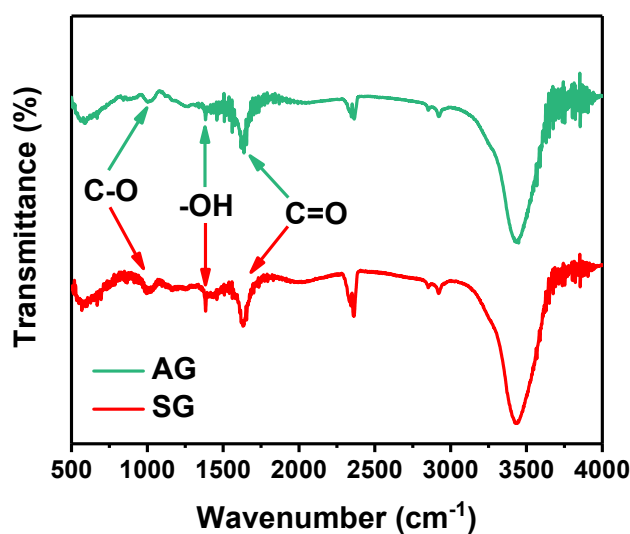

Fig. S3 FTIR spectra of AG and SG.

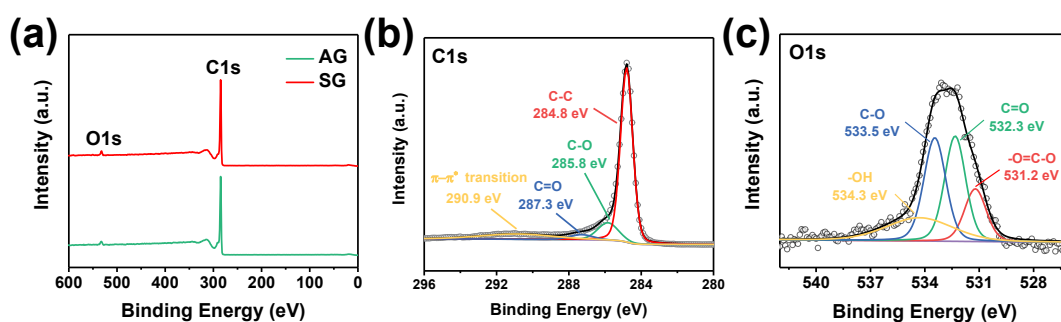

Fig. S4 (a) XPS survey spectra of AG and SG, (b) C1s and (c) O1s spectra of AG.

Table S3 Atomic ratio measured by XPS survey results.

| Samples | C (%) | O (%) |
|---------|-------|-------|
| AG      | 93.96 | 6.04  |
| SG      | 87.59 | 12.41 |

Table S4 Comparison of physical parameters of AG and SG.

| Materials | BET surface area (m <sup>2</sup> g <sup>-1</sup> ) | Pore volume (cm <sup>3</sup> g <sup>-1</sup> ) | Interlayer distance (nm) | I <sub>D</sub> /I <sub>G</sub> | Surface element content (at%) | Transition metals content (ppm)       |
|-----------|----------------------------------------------------|------------------------------------------------|--------------------------|--------------------------------|-------------------------------|---------------------------------------|
| SG        | 3.49                                               | 0.015                                          | 0.341                    | 0.70                           | C: 87.59<br>O: 12.41          | Ni: 215.05<br>Co: 75.33<br>Mn: 365.88 |
| AG        | 2.23                                               | 0.010                                          | 0.339                    | 0.16                           | C: 93.96<br>O: 6.04           | /                                     |

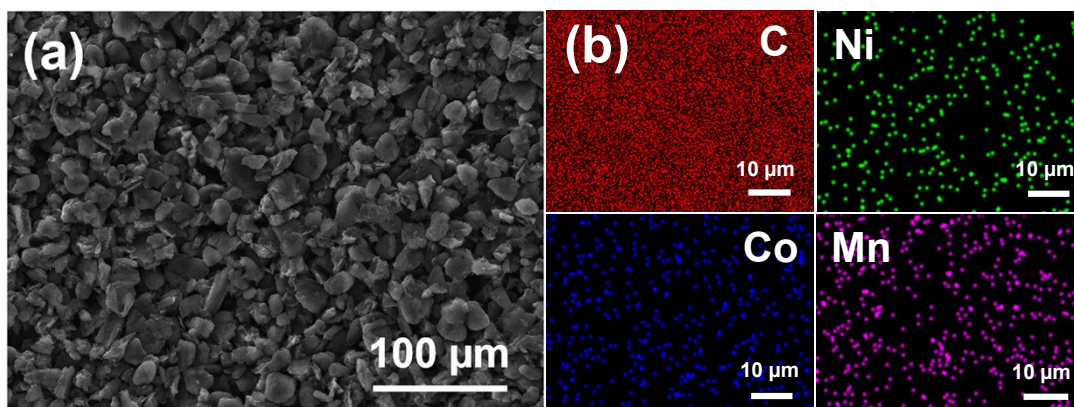

**Fig. S5** (a) SEM image and (b) corresponding EDS mapping images of AG-modified separator.

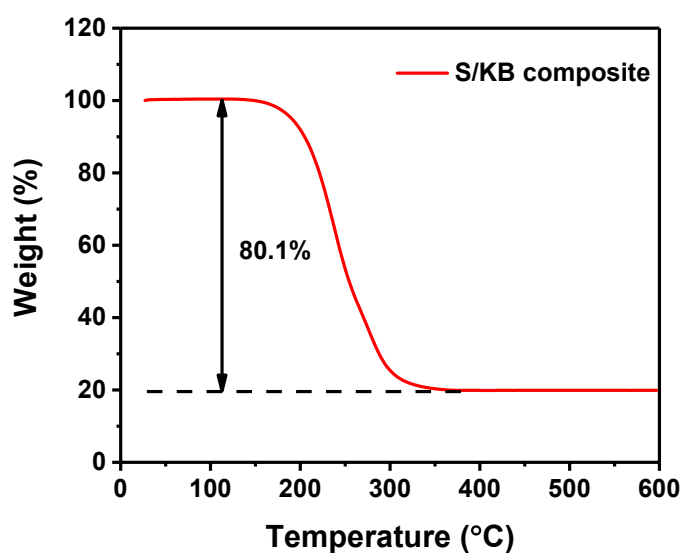

**Fig. S6** TGA curve of S/KB composite in  $Ar_2$ .

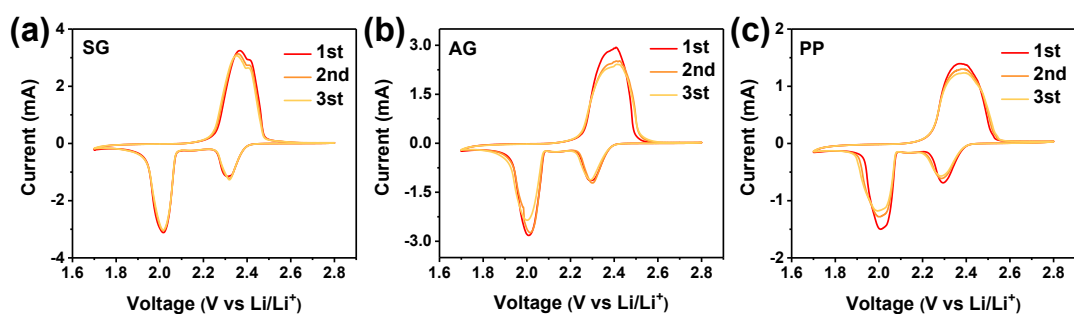

**Fig. S7** CV curves of the cells with (a) SG-modified, (b) AG-modified and (c) PP separators for the first three cycles at a scan rate of  $0.1 \text{ mV s}^{-1}$ .

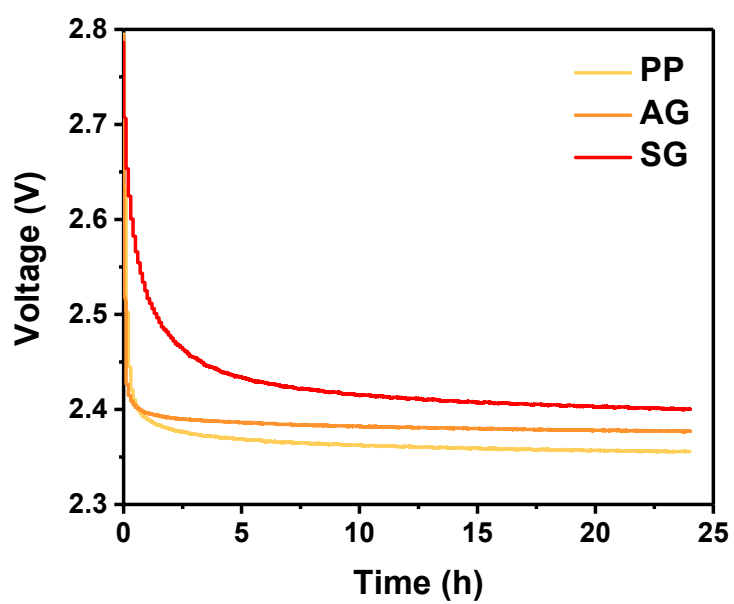

**Fig. S8** Time-dependent open-circuit voltages with different separators.

**Table S5** Comparison of electrochemical performance with the other carbon-based interlayer materials in recent reported literatures.

| Materials              | Initial capacity<br>(mAh g <sup>-1</sup> ) | Cycles     | Reversible<br>capacity<br>(mAh g <sup>-1</sup> ) | Rate<br>performance<br>(mAh g <sup>-1</sup> ) | Ref                  |
|------------------------|--------------------------------------------|------------|--------------------------------------------------|-----------------------------------------------|----------------------|
| Ni/SiO <sub>2</sub> /G | 1037, 1 C                                  | 300        | 772                                              | 782, 2 C                                      | 1                    |
| GF/GF@ZnO              | 1051, 0.5 C                                | 100        | 672                                              | 518, 2 C                                      | 2                    |
| CuS/graphene           | 1029, 0.5 C                                | 200        | 639                                              | 568, 3 C                                      | 3                    |
| MG                     | ~700, 1 C                                  | 250        | ~600                                             | ~750, 1 C                                     | 4                    |
| CTC                    | 900, 0.5 C                                 | 200        | 614                                              | 650, 2 C                                      | 5                    |
| CNF/CoS/KB             | ~1000, 1 C                                 | 760        | ~422                                             | 650, 2 C                                      | 6                    |
| NMT                    | ~750, 0.5 C                                | 500        | 463.7                                            | 518.7, 1 C                                    | 7                    |
| GO/CNT                 | ~800, 2 C                                  | 200        | 441.97                                           | 560, 2 C                                      | 8                    |
| CCC                    | 827, 1 C                                   | 1000       | 498                                              | 718, 2 C                                      | 9                    |
| NPPC                   | 757.3, 1 C                                 | 500        | 525.8                                            | 758.1, 2 C                                    | 10                   |
| NSHPC                  | 960, 1 C                                   | 100        | 723                                              | 515, 1 C                                      | 11                   |
| NB-PPCA                | 987.6, 1 C                                 | 500        | 586.6                                            | 748.7, 2 C                                    | 12                   |
| AG                     | 939, 0.5 C<br>845, 1 C                     | 200<br>500 | 626<br>496                                       | 744, 2 C                                      | <b>This<br/>work</b> |
| SG                     | 1042, 0.5 C<br>968, 1 C                    | 200<br>500 | 762<br>562                                       | 813, 2 C                                      |                      |

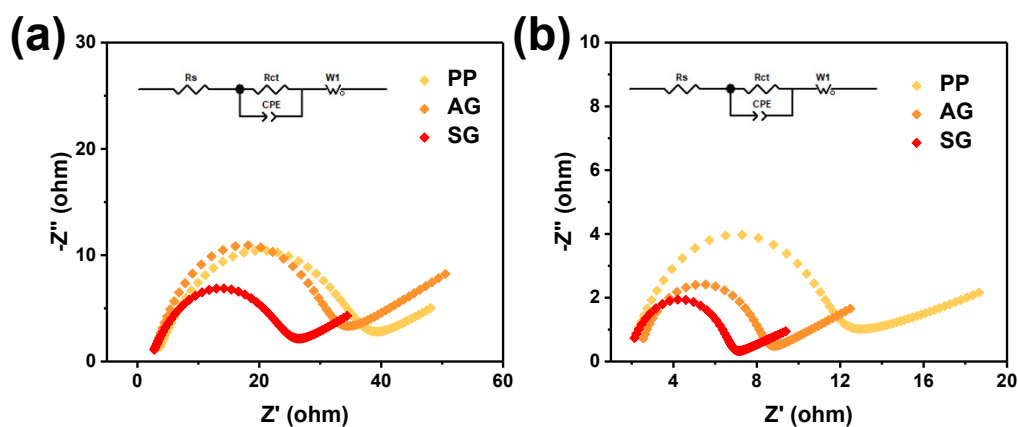

**Fig. S9** EIS spectra of the cells with PP, AG and SG-modified separators (a) before and (b) after 100 cycles at 0.5 C, respectively.

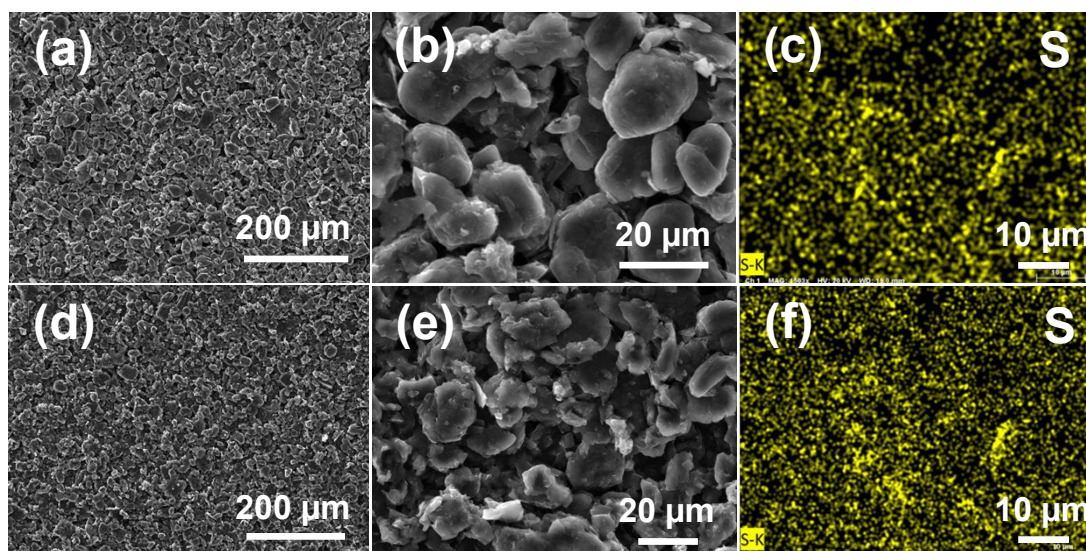

**Fig. S10** SEM images of (a, b) AG and (d, e) SG-modified separator and (c, f) corresponding EDS mapping images of S after 100 cycles at 0.5 C.

## References

- 1 C. Chen, Q. Jiang, H. Xu, Y. Zhang, B. Zhang, Z. Zhang, Z. Lin and S. Zhang, *Nano Energy*, 2020, **76**, 105033.
- 2 R. Yi, C. Liu, Y. Zhao, L. J. Hardwick, Y. Li, X. Geng, Q. Zhang, L. Yang and C. Zhao, *Electrochim. Acta*, 2019, **299**, 479-488.
- 3 H. Li, L. Sun, Y. Zhao, T. Tan and Y. Zhang, *Appl. Surf. Sci.*, 2019, **466**, 309-319.

- 4 S. Tan, Y. Wu, S. Kan, M. Bu, Y. Liu, L. Yang, Y. Yang and H. Liu, *Electrochim. Acta*, 2020, **348**, 136173.
- 5 Y. Yang, H. Xu, S. Wang, Y. Deng, X. Qin, X. Qin and G. Chen, *Electrochim. Acta*, 2019, **297**, 641-649.
- 6 Y. Yang, S. Wang, L. Zhang, Y. Deng, H. Xu, X. Qin and G. Chen, *Chem. Eng. J.*, 2019, **369**, 77-86.
- 7 C. Yan, X. Zhou, Y. Wei and S. He, *Dalton Trans.*, 2020, **49**, 11675-11681.
- 8 D. K. Lee, S. J. Kim, Y.-J. Kim, H. Choi, D. W. Kim, H.-J. Jeon, C. W. Ahn, J. W. Lee and H.-T. Jung, *Adv. Mater. Interfaces*, 2019, **6**, 1801992.
- 9 B. Zheng, N. Li, J. Yang and J. Xi, *Chem. Commun.*, 2019, **55**, 2289-2292.
- 10 Z. Song, X. Lu, Q. Hu, J. Ren, W. Zhang, Q. Zheng and D. Lin, *J. Power Sources*, 2019, **421**, 23-31.
- 11 S. Jiang, M. Chen, X. Wang, Y. Zhang, C. Huang, Y. Zhang and Y. Wang, *Chem. Eng. J.*, 2019, **355**, 478-486.
- 12 L. Zhu, H. Jiang, W. Ran, L. You, S. Yao, X. Shen and F. Tu, *Appl. Surf. Sci.*, 2019, **489**, 154-164.
